# Supplementary material
Source: PubMed Central journal article supplement (PMC1237135)

### **Supplementary data**

#### **Fig. 1 Changes in gene expression in LPP2 and LPP3 over-expressing cells**

Affymetrix array analysis (RNA isolated from HEK 293 cells, n=3 for each cell line) using whole genome chips showing changes in the expression level of certain genes in (a) LPP2 over-expressing HEK 293 cells *versus* vector-transfected HEK 293 cells; (b) LPP3 over-expressing HEK 293 cells *versus* vector-transfected HEK 293 cells.

# Supplementary Data

## Fig. 1

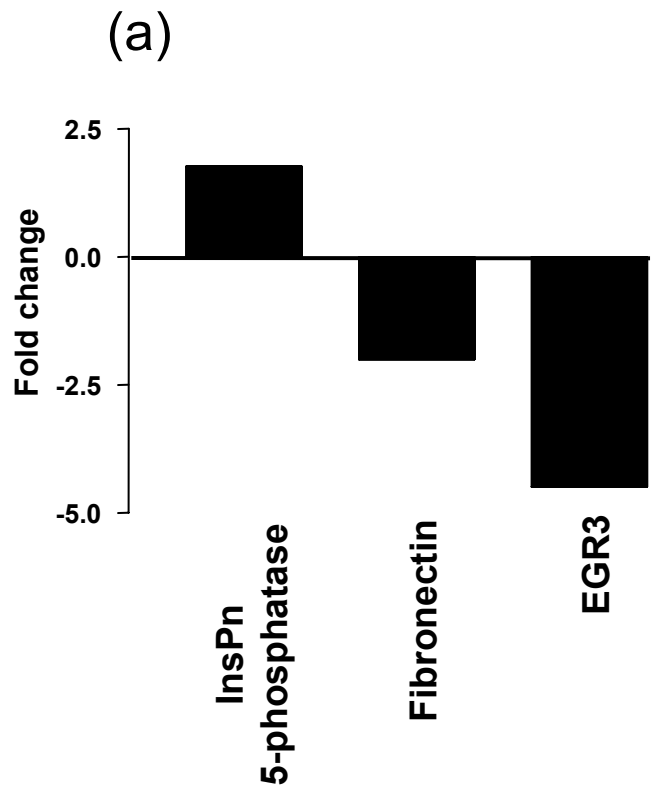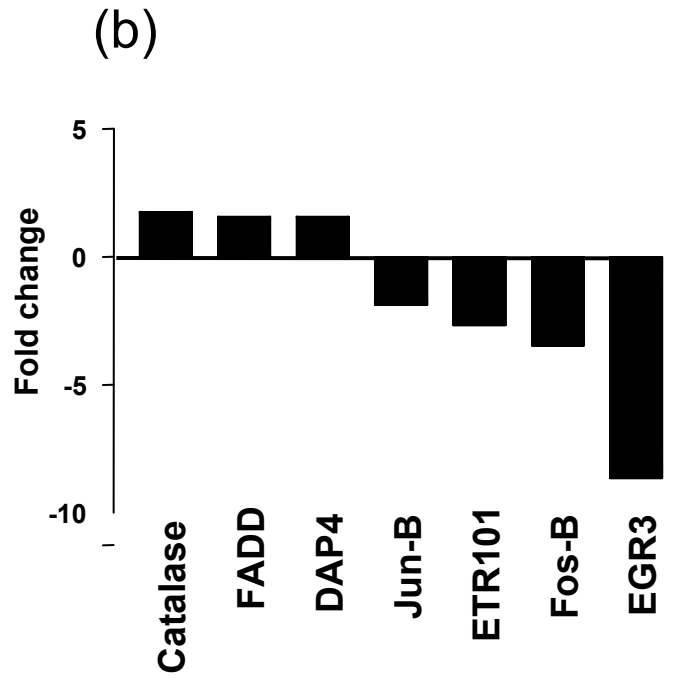

Supplement: bj3910025add.pdf [file bj3910025add.pdf]
